# Supplementary material for: Metagenomic Analysis of Bacterial Communities in Agricultural Soils from Vietnam with Special Attention to Phosphate Solubilizing Bacteria
Source: MDPI journal article supplement (doi:10.3390/microorganisms9091796), 2021-08-24
Supplement: s1 [file s1]

## Supplementary data

**Table S1.** Sample names and crops grown on sampling sites

| Soil sample | Plantation                                                   |                                                                                 |
|-------------|--------------------------------------------------------------|---------------------------------------------------------------------------------|
|             | Perennial                                                    | Annual                                                                          |
| CL01        | N/A                                                          | Maize, beans and peas, loofa, gardening plants                                  |
| CL02        | Rubber plant, jackfruit, avocado, black pepper, lime, banana | Elephant grass, bean, turmeric, ginger, sweet potatoes, taros                   |
| CL03        | N/A                                                          | Legumes, maize, sweet potato, cassava                                           |
| VL01        | Black pepper, jackfruit, tea tree                            | Sweet potato, taro, maize, purple yam, ginger, turmeric, lesser galangal, chive |
| VL02        | Black pepper, rubber plant, banana, jackfruit                | Sweet potato, taro, maize, purple yam, ginger, turmeric                         |
| VL03        | Tea tree, banana, jackfruit, orange, lime, dragon fruit      | Beans and peas, sweet potato, tapioca, sesame                                   |

N/A: not applicable, no perennial crop grown in these sites.

**Table S2.** The bacterial  $\alpha$ -diversity indices in the soil samples

| Sample | OTU  | Chao1 | Shannon | Good's coverage (%) |
|--------|------|-------|---------|---------------------|
| CL01   | 1496 | 1622  | 6.10    | 99.84               |
| CL02   | 1121 | 1223  | 5.85    | 99.97               |
| CL03   | 809  | 952   | 5.47    | 99.49               |
| VL01   | 1028 | 1087  | 5.77    | 99.89               |
| VL02   | 934  | 1017  | 5.70    | 99.26               |
| VL03   | 898  | 969   | 5.92    | 99.63               |

**Table S3.** Pearson's correlations between soil properties, phosphatase activities, *phoD* gene abundance and the abundance of bacterial phyla.

|                       | pH   | TP   | Corg | TN    | TK    | sand  | silt  | clay | ALP  | ACP  | <i>phoD</i> abundance | Chloroflexi | Proteobacteria | Actinobacteria | Acidobacteria | Firmicutes | Planctomycetes | Bacteroidetes | Verrucomicrobia | WPS 2 | Gemmatimonadetes | Rokubacteria | Nitrospirae | Latesolobacteria | Patesolobacteria | GALLS | Armatimonadetes | Zwibacteria | Dadsobacteria | Entothoonellaeota | BRC1 | FCPU426 |
|-----------------------|------|------|------|-------|-------|-------|-------|------|------|------|-----------------------|-------------|----------------|----------------|---------------|------------|----------------|---------------|-----------------|-------|------------------|--------------|-------------|------------------|------------------|-------|-----------------|-------------|---------------|-------------------|------|---------|
| pH                    | 1    |      |      |       |       |       |       |      |      |      |                       |             |                |                |               |            |                |               |                 |       |                  |              |             |                  |                  |       |                 |             |               |                   |      |         |
| TP                    | 0.29 | 1    |      |       |       |       |       |      |      |      |                       |             |                |                |               |            |                |               |                 |       |                  |              |             |                  |                  |       |                 |             |               |                   |      |         |
| Corg                  | 0.39 | 0.76 | 1    |       |       |       |       |      |      |      |                       |             |                |                |               |            |                |               |                 |       |                  |              |             |                  |                  |       |                 |             |               |                   |      |         |
| TN                    | 0.12 | 0.38 | 0.52 | 1     |       |       |       |      |      |      |                       |             |                |                |               |            |                |               |                 |       |                  |              |             |                  |                  |       |                 |             |               |                   |      |         |
| TK                    | 0.19 | 0.27 | 0.34 | 0.95  | 1     |       |       |      |      |      |                       |             |                |                |               |            |                |               |                 |       |                  |              |             |                  |                  |       |                 |             |               |                   |      |         |
| sand                  | 0.06 | 0.02 | 0.19 | 0.88  | 0.88  | 1     |       |      |      |      |                       |             |                |                |               |            |                |               |                 |       |                  |              |             |                  |                  |       |                 |             |               |                   |      |         |
| silt                  | 0.12 | 0.39 | 0.02 | 0.63  | 0.57  | 0.71  | 1     |      |      |      |                       |             |                |                |               |            |                |               |                 |       |                  |              |             |                  |                  |       |                 |             |               |                   |      |         |
| clay                  | 0.09 | 0.56 | 0.27 | 0.24  | 0.31  | 0.27  | 0.49  | 1    |      |      |                       |             |                |                |               |            |                |               |                 |       |                  |              |             |                  |                  |       |                 |             |               |                   |      |         |
| ALP                   | 0.00 | 0.77 | 0.92 | 0.51  | 0.45  | 0.15  | 0.13  | 0.37 | 1    |      |                       |             |                |                |               |            |                |               |                 |       |                  |              |             |                  |                  |       |                 |             |               |                   |      |         |
| ACP                   | 0.43 | 0.87 | 0.91 | 0.32  | 0.12  | 0.11  | 0.23  | 0.17 | 0.84 | 1    |                       |             |                |                |               |            |                |               |                 |       |                  |              |             |                  |                  |       |                 |             |               |                   |      |         |
| <i>phoD</i> abundance | 0.77 | 0.19 | 0.32 | 0.42  | 0.68  | 0.54  | 0.28  | 0.28 | 0.01 | 0.46 | 1                     |             |                |                |               |            |                |               |                 |       |                  |              |             |                  |                  |       |                 |             |               |                   |      |         |
| Chloroflexi           | 0.58 | 0.13 | 0.60 | 0.70  | 0.49  | 0.67  | 0.66  | 0.07 | 0.35 | 0.33 | 0.19                  | 1           |                |                |               |            |                |               |                 |       |                  |              |             |                  |                  |       |                 |             |               |                   |      |         |
| Proteobacteria        | 0.19 | 0.16 | 0.03 | 0.82* | 0.88* | 0.91* | 0.83* | 0.00 | 0.02 | 0.26 | 0.71                  | 0.47        | 1              |                |               |            |                |               |                 |       |                  |              |             |                  |                  |       |                 |             |               |                   |      |         |
| Actinobacteria        | 0.68 | 0.22 | 0.62 | 0.69  | 0.46  | 0.66  | 0.59  | 0.01 | 0.34 | 0.38 | 0.25                  | 0.99        | 0.42           | 1              |               |            |                |               |                 |       |                  |              |             |                  |                  |       |                 |             |               |                   |      |         |
| Acidobacteria         | 0.22 | 0.12 | 0.23 | 0.84* | 0.76  | 0.92* | 0.89* | 0.07 | 0.10 | 0.07 | 0.32                  | 0.83        | 0.87           | 0.79           | 1             |            |                |               |                 |       |                  |              |             |                  |                  |       |                 |             |               |                   |      |         |
| Firmicutes            | 0.60 | 0.09 | 0.37 | 0.62  | 0.41  | 0.66  | 0.80* | 0.27 | 0.08 | 0.13 | 0.18                  | 0.95        | 0.53           | 0.94           | 0.87          | 1          |                |               |                 |       |                  |              |             |                  |                  |       |                 |             |               |                   |      |         |
| Planctomycetes        | 0.24 | 0.10 | 0.35 | 0.82* | 0.72  | 0.85* | 0.89* | 0.16 | 0.21 | 0.04 | 0.22                  | 0.89        | 0.80           | 0.84           | 0.98*         | 0.91       | 1              |               |                 |       |                  |              |             |                  |                  |       |                 |             |               |                   |      |         |
| Bacteroidetes         | 0.65 | 0.26 | 0.46 | 0.39  | 0.62  | 0.47  | 0.44  | 0.02 | 0.20 | 0.48 | 0.91*                 | 0.22        | 0.75           | 0.27           | 0.34          | 0.12       | 0.23           | 1             |                 |       |                  |              |             |                  |                  |       |                 |             |               |                   |      |         |
| Verrucomicrobia       | 0.59 | 0.26 | 0.36 | 0.51  | 0.71  | 0.59  | 0.57  | 0.05 | 0.14 | 0.44 | 0.90*                 | 0.06        | 0.85           | 0.12           | 0.49          | 0.04       | 0.39           | 0.98          | 1               |       |                  |              |             |                  |                  |       |                 |             |               |                   |      |         |
| WPS 2                 | 0.68 | 0.18 | 0.60 | 0.68  | 0.44  | 0.66  | 0.60  | 0.01 | 0.31 | 0.35 | 0.25                  | 0.99        | 0.42           | 1.00           | 0.80          | 0.95       | 0.84           | 0.28          | 0.12            | 1     |                  |              |             |                  |                  |       |                 |             |               |                   |      |         |
| Gemmatimonadetes      | 0.70 | 0.29 | 0.42 | 0.42  | 0.66  | 0.54  | 0.44  | 0.08 | 0.16 | 0.52 | 0.96**                | 0.17        | 0.78           | 0.24           | 0.38          | 0.10       | 0.27           | 0.98          | 0.98            | 0.24  | 1                |              |             |                  |                  |       |                 |             |               |                   |      |         |
| Rokubacteria          | 0.75 | 0.30 | 0.47 | 0.34  | 0.60  | 0.46  | 0.37  | 0.06 | 0.19 | 0.54 | 0.96**                | 0.27        | 0.71           | 0.33           | 0.29          | 0.19       | 0.18           | 0.98          | 0.96            | 0.33  | 1.00             | 1            |             |                  |                  |       |                 |             |               |                   |      |         |
| Nitrospirae           | 0.72 | 0.28 | 0.48 | 0.34  | 0.60  | 0.46  | 0.36  | 0.08 | 0.21 | 0.53 | 0.95**                | 0.28        | 0.71           | 0.33           | 0.29          | 0.19       | 0.17           | 0.99          | 0.97            | 0.33  | 0.99             | 1.00         | 1           |                  |                  |       |                 |             |               |                   |      |         |
| Latesolobacteria      | 0.82 | 0.37 | 0.50 | 0.24  | 0.53  | 0.42  | 0.28  | 0.14 | 0.20 | 0.62 | 0.97**                | 0.31        | 0.64           | 0.38           | 0.23          | 0.25       | 0.13           | 0.92          | 0.90            | 0.38  | 0.97             | 0.98         | 0.97        | 1                |                  |       |                 |             |               |                   |      |         |
| Patesolobacteria      | 0.60 | 0.29 | 0.45 | 0.41  | 0.62  | 0.49  | 0.50  | 0.08 | 0.23 | 0.48 | 0.88*                 | 0.17        | 0.78           | 0.23           | 0.39          | 0.05       | 0.28           | 1.00          | 0.99            | 0.22  | 0.97             | 0.97         | 0.98        | 0.90             | 1                |       |                 |             |               |                   |      |         |
| GALLS                 | 0.16 | 0.38 | 0.04 | 0.56  | 0.67  | 0.60  | 0.03  | 0.71 | 0.09 | 0.07 | 0.64                  | 0.04        | 0.54           | 0.03           | 0.29          | 0.09       | 0.13           | 0.58          | 0.56            | 0.01  | 0.59             | 0.57         | 0.61        | 0.52             | 0.55             | 1     |                 |             |               |                   |      |         |
| Armatimonadetes       | 0.50 | 0.03 | 0.57 | 0.62  | 0.44  | 0.65  | 0.63  | 0.05 | 0.33 | 0.25 | 0.17                  | 0.98        | 0.43           | 0.95           | 0.80          | 0.92       | 0.87           | 0.26          | 0.09            | 0.96  | 0.18             | 0.27         | 0.29        | 0.27             | 0.22             | 0.11  | 1               |             |               |                   |      |         |
| Zwibacteria           | 0.82 | 0.37 | 0.50 | 0.26  | 0.54  | 0.43  | 0.30  | 0.13 | 0.20 | 0.61 | 0.97**                | 0.30        | 0.66           | 0.37           | 0.25          | 0.24       | 0.14           | 0.93          | 0.91            | 0.37  | 0.97             | 0.98         | 0.97        | 1.00             | 0.91             | 0.53  | 0.27            | 1           |               |                   |      |         |
| Dadsobacteria         | 0.72 | 0.29 | 0.46 | 0.36  | 0.61  | 0.47  | 0.39  | 0.05 | 0.19 | 0.52 | 0.95**                | 0.25        | 0.73           | 0.31           | 0.31          | 0.16       | 0.20           | 0.99          | 0.97            | 0.31  | 1.00             | 1.00         | 1.00        | 0.97             | 0.98             | 0.58  | 0.26            | 0.97        | 1             |                   |      |         |
| Entothoonellaeota     | 0.66 | 0.24 | 0.44 | 0.40  | 0.63  | 0.48  | 0.43  | 0.02 | 0.18 | 0.47 | 0.92**                | 0.22        | 0.75           | 0.27           | 0.34          | 0.13       | 0.23           | 1.00          | 0.98            | 0.27  | 0.99             | 0.99         | 0.99        | 0.99             | 0.59             | 0.25  | 0.94            | 0.99        | 1             |                   |      |         |
| BRC1                  | 0.51 | 0.04 | 0.57 | 0.67  | 0.47  | 0.64  | 0.71  | 0.17 | 0.33 | 0.28 | 0.17                  | 0.99        | 0.48           | 0.95           | 0.83          | 0.95       | 0.91           | 0.20          | 0.03            | 0.96  | 0.14             | 0.23         | 0.25        | 0.27             | 0.14             | 0.13  | 0.99            | 0.26        | 0.22          | 0.19              | 1    |         |
| FCPU426               | 0.64 | 0.23 | 0.43 | 0.42  | 0.64  | 0.49  | 0.44  | 0.00 | 0.17 | 0.46 | 0.91*                 | 0.21        | 0.76           | 0.26           | 0.35          | 0.11       | 0.24           | 1.00          | 0.99            | 0.26  | 0.98             | 0.98         | 0.99        | 0.92             | 1.00             | 0.60  | 0.25            | 0.93        | 0.99          | 1.00              | 0.19 | 1       |

\* Correlation between soil property and abundance of phylum is significant at the 0.05 level.

\*\* Correlation between soil property and abundance of phylum is significant at the 0.01 level.

SOC: soil organic carbon; TN: total nitrogen; TP: total P; TK: total potassium; AcP: acid phosphatase activity; ALP: alkaline phosphatase activity.

**Table S4.** Pearson's correlations between soil properties, phosphatase activities and *phoD* gene abundance

|           | pH    | TP    | SOC   | TN     | TK    | AIP   | AcP   | abundance | Chao | Shannon |
|-----------|-------|-------|-------|--------|-------|-------|-------|-----------|------|---------|
| pH        | 1     |       |       |        |       |       |       |           |      |         |
| TP        | -0.29 | 1     |       |        |       |       |       |           |      |         |
| SOC       | -0.39 | 0.76  | 1     |        |       |       |       |           |      |         |
| TN        | -0.12 | 0.38  | 0.52  | 1      |       |       |       |           |      |         |
| TK        | 0.19  | 0.27  | 0.34  | 0.95** | 1     |       |       |           |      |         |
| AIP       | 0.00  | 0.77  | 0.92* | 0.51   | 0.45  | 1     |       |           |      |         |
| AcP       | -0.43 | 0.87* | 0.91* | 0.32   | 0.12  | 0.84* | 1     |           |      |         |
| abundance | 0.77  | -0.19 | -0.32 | 0.42   | 0.68  | -0.01 | -0.46 | 1         |      |         |
| Chao      | 0.39  | -0.06 | -0.14 | 0.73   | 0.87* | 0.02  | -0.25 | 0.84*     | 1    |         |
| Shannon   | 0.58  | 0.02  | 0.02  | 0.62   | 0.82* | 0.26  | -0.25 | 0.90*     | 0.76 | 1       |

\* Correlation is significant at the 0.05 level.

\*\* Correlation is significant at the 0.01 level.

TP: total P; SOC: soil organic carbon; TN: total nitrogen; TK: total potassium; AIP: alkaline phosphatase activity; AcP: acid phosphatase activity; abundance: *phoD* gene abundance; Chao: Chao1 Richness estimate for an OTU definition; Shannon: Shannon diversity index.

**Table S5.** Identities of the PSB strains

| Strains | PSB type <sup>a</sup> | Most closely related species        | Accession number | % identity <sup>b</sup> |
|---------|-----------------------|-------------------------------------|------------------|-------------------------|
| CL02.1  | IPSB                  | <i>Serratia</i> sp.                 | MT472058         | 100                     |
| VL01.1  | IPSB                  | <i>Achromobacter</i> sp.            | MT472068         | 100                     |
| VL02.1  | IPSB                  | <i>Serratia</i> sp.                 | MT472074         | 100                     |
| VL02.2  | IPSB                  | <i>Serratia</i> sp.                 | MT472075         | 99.9                    |
| VL03.3  | IPSB                  | <i>Serratia</i> sp.                 | MT472080         | 100                     |
| CL01.2  | OPMB                  | <i>Stenotrophomonas maltophilia</i> | MT472051         | 99.88                   |
| CL01.3  | OPMB                  | <i>Stenotrophomonas maltophilia</i> | MT472052         | 100                     |
| CL02.2  | OPMB                  | <i>Brevibacillus</i> sp.            | MT472059         | 99.44                   |
| CL03.2  | OPMB                  | <i>Bacillus</i> sp.                 | MT472060         | 99.78                   |
| CL03.5  | OPMB                  | <i>Brevibacillus</i> sp.            | MT472061         | 100                     |
| CL03.6  | OPMB                  | <i>Bacillus</i> sp.                 | MT472062         | 99.78                   |
| CL03.7  | OPMB                  | <i>Lysinibacillus</i> sp.           | MT472063         | 100                     |
| CL03.8  | OPMB                  | <i>Bacillus</i> sp.                 | MT472064         | 100                     |
| VL01.2  | OPMB                  | <i>Brevibacillus parabrevis</i>     | MT472069         | 99.02                   |
| VL01.3  | OPMB                  | <i>Brevibacillus</i> sp.            | MT472070         | 99.77                   |

<sup>a</sup> IPSB: inorganic phosphate solubilizing bacteria; OPMB: organic phosphorus mineralizing bacteria

<sup>b</sup> 602-1014 bp used for Blast analysis

**Table S6.** Identities of *phoD*-harbouring isolates

| Strains     | Most closely related species       | Accession number | % identity <sup>a</sup> |
|-------------|------------------------------------|------------------|-------------------------|
| CL01.9      | <i>Bacillus</i> sp.                | MT472053         | 100                     |
| CL01.10     | <i>Bacillus niacini</i>            | MT472054         | 100                     |
| CL01.16     | <i>Pseudomonas mendocina</i>       | MT472055         | 100                     |
| CL01.42     | <i>Bacillus</i> sp.                | MT472056         | 100                     |
| CL01.45     | <i>Bacillus</i> sp.                | MT472057         | 100                     |
| CL03.10     | <i>Bacillus</i> sp.                | MT472065         | 100                     |
| CL03.27     | <i>Bacillus</i> sp.                | MT472066         | 100                     |
| CL03.35     | <i>Bacillus</i> sp.                | MT472067         | 100                     |
| VL01.5      | <i>Paenibacillus</i> sp.           | MT472071         | 99.9                    |
| VL01.35     | <i>Bacillus</i> sp.                | MT472072         | 100                     |
| VL01.41     | <i>Bacillus</i> sp.                | MT472073         | 100                     |
| VL02.2.phod | <i>Streptomyces lilacinus</i>      | MT472076         | 100                     |
| VL02.27     | <i>Bacillus</i> sp.                | MT472077         | 100                     |
| VL02.34     | <i>Pseudoarthrobacter defluvii</i> | MT472078         | 99.82                   |
| VL02.50     | <i>Bacillus</i> sp.                | MT472079         | 100                     |
| VL03.42     | <i>Bacillus</i> sp.                | MT472081         | 100                     |

<sup>a</sup> 844-1025 bp used for Blast analysis
